# Supplementary material for: Chronic Repression of mTOR Complex 2 Induces Changes in the Gut Microbiota of Diet-induced Obese Mice
Source: PubMed Central journal article supplement (PMC4965768; doi:10.1038/srep30887), 2016-07-29
Supplement: srep30887-s1.pdf [file srep30887-s1.pdf]

SUPPLEMENTARY FIGURES AND TABLE

## Chronic Repression of mTOR Complex 2 Induces Changes in the Gut Microbiota of Diet-induced Obese Mice

Mi-Ja Jung, Jina Lee, Na-Ri Shin, Min-Soo Kim, Dong-Wook Hyun, Ji-Hyun Yun, Pil Soo Kim, Tae Woong Whon, and Jin-Woo Bae

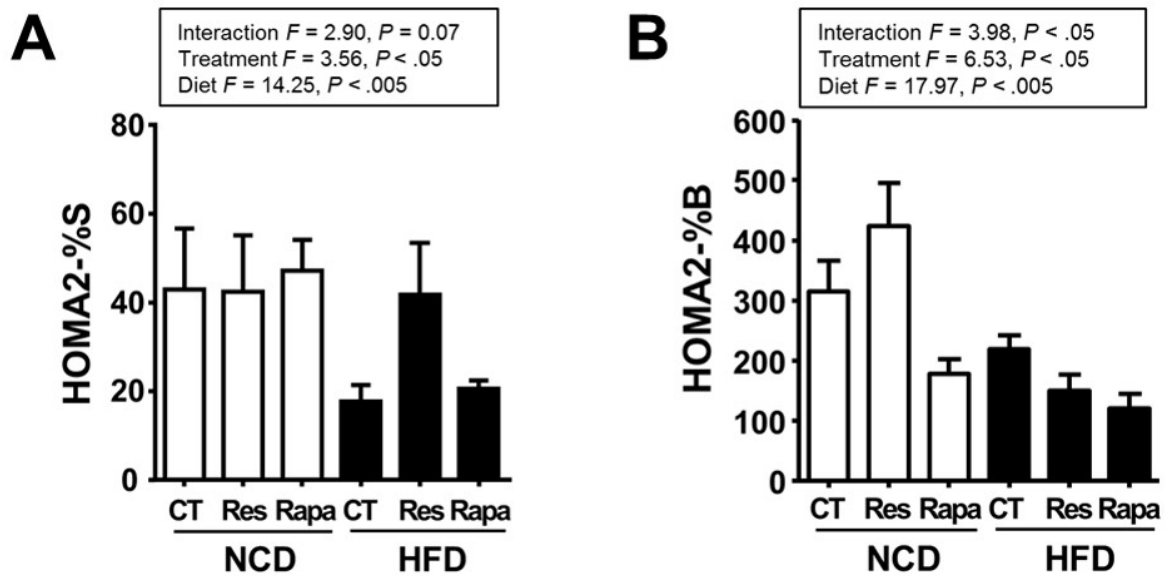

**Supplementary Figure S1.** Resveratrol improves, whereas rapamycin impairs, glucose homeostasis.

(A) HOMA2-%S index and (B) QUICKI were calculated from fasting glucose and insulin levels ( $n = 5$  per group). Data are expressed as the mean  $\pm$  SEM.  $F$ - and  $p$ -values are from two-way ANOVA after Bonferroni's post hoc test. \* $P < .05$ , \*\* $P < .005$ .

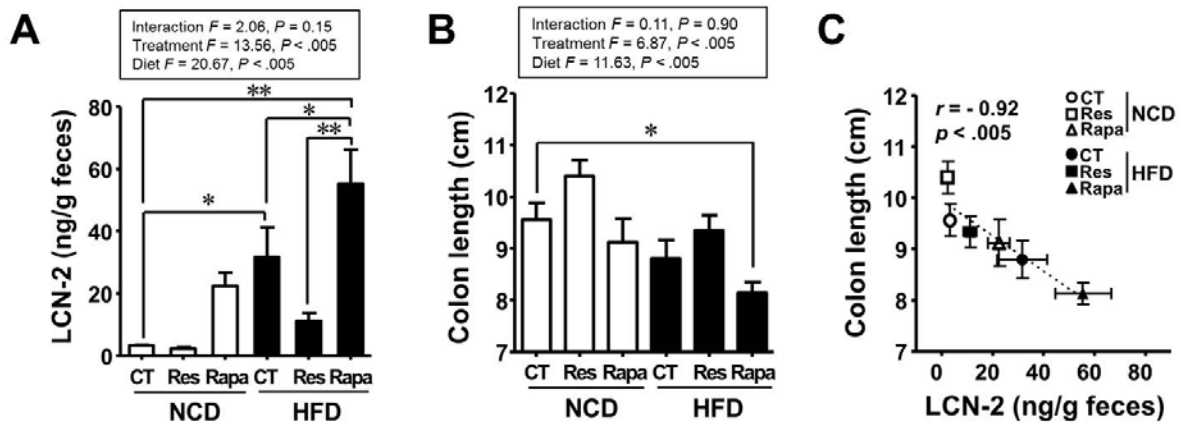

**Supplementary Figure S2.** Resveratrol ameliorates, whereas rapamycin exacerbates, intestinal inflammation. (A) The concentration of faecal LCN-2 (ng/g faeces) and (B) colon length (cm) were measured after 8 weeks of treatment ( $n = 5$  per group). (C) The correlation between faecal LCN-2 concentrations and colon length was determined using two-tailed Pearson's  $r$  correlation analysis. Data are expressed as the mean  $\pm$  SEM.  $F$ - and  $p$ -values are from two-way ANOVA after Bonferroni's post hoc test.  $*P < .05$ ,  $**P < .005$ .

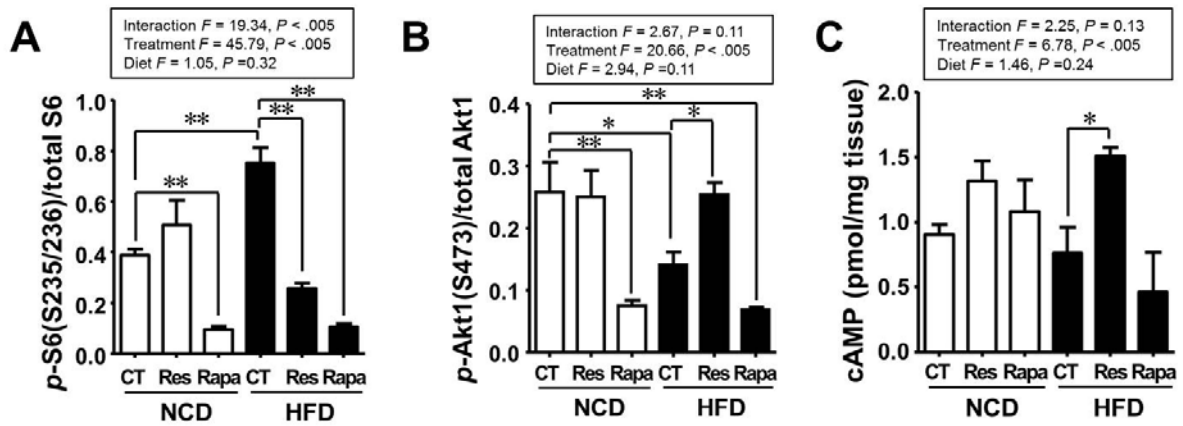

**Supplementary Figure S3.** Effects of resveratrol or rapamycin treatment on the mTOR signaling pathway in NCD- or HFD-fed mice. (A) p-S6 (Ser235/236)/total S6 ( $n = 5$  per group), (B) p-Akt1 (Ser473)/total Akt1 ( $n = 3$  per group) and (C) cAMP concentrations ( $n = 5$  per group) in liver tissue samples. To examine Akt1 phosphorylation, mice were injected with 0.5U of insulin per kg body weight prior to sacrifice. Data are expressed as the mean  $\pm$  SEM.  $F$ - and  $p$ -values are from two-way ANOVA after Bonferroni's post hoc test. \* $P < .05$ , \*\* $P < .005$ .

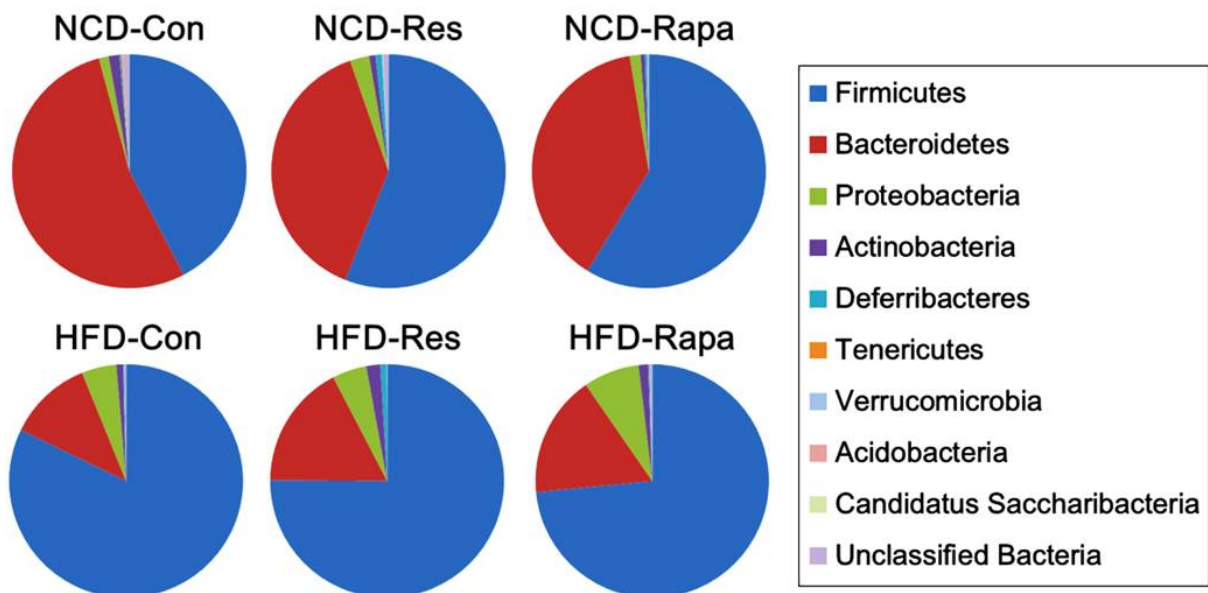

**Supplementary Figure S4.** Changes in the faecal bacterial community following resveratrol or rapamycin treatment. Pie charts showing the relative abundance (%) of different bacterial phyla in the different diet and treatment groups (n = 5 per group).

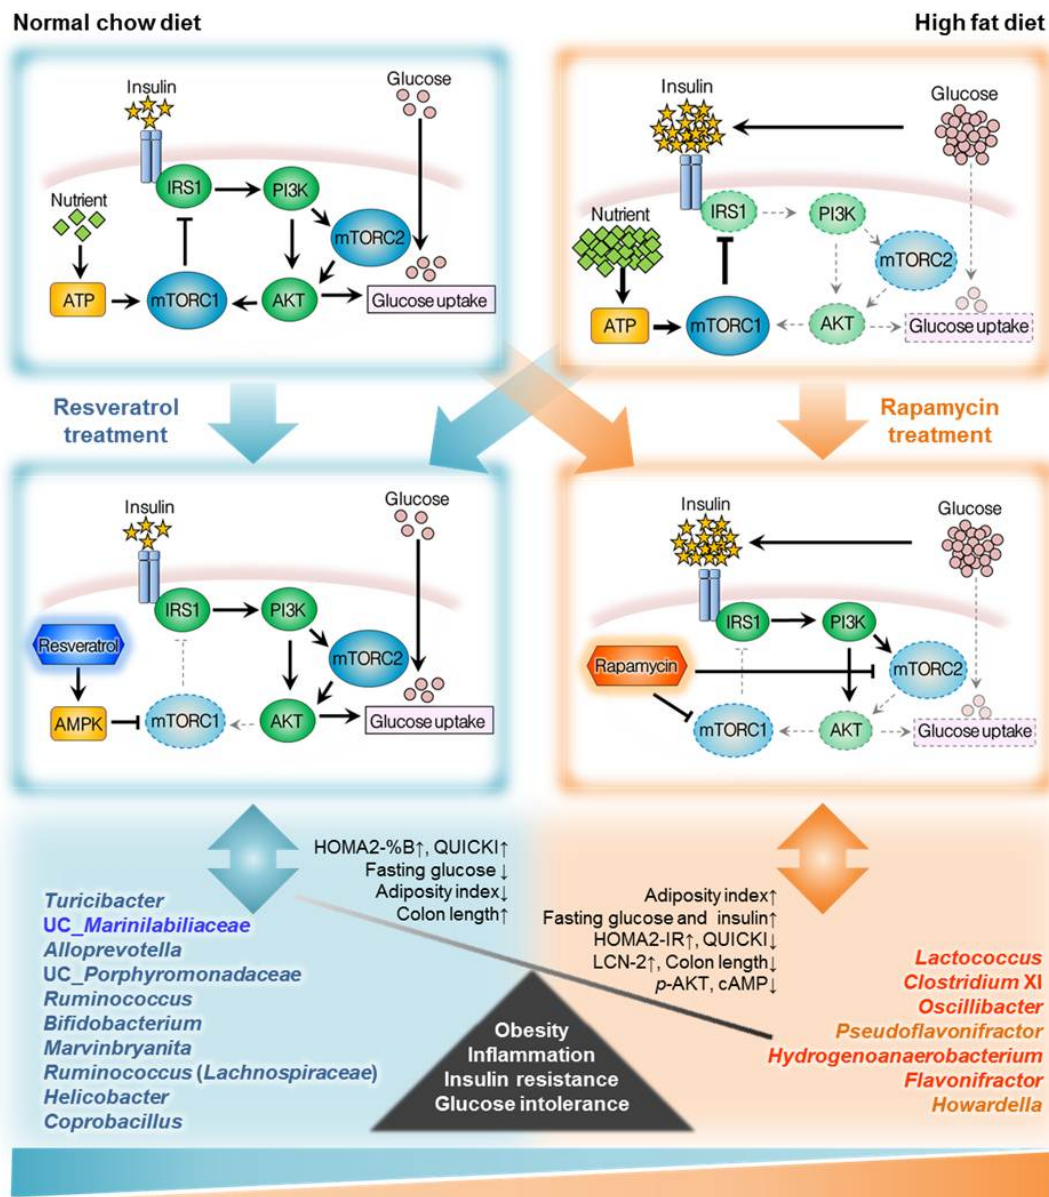

**Supplementary Figure S5.** Summary of the effects of resveratrol or rapamycin treatment on the interaction between host physiology and gut microbiota under normal-chow diet or high-fat diet conditions.

**Supplementary Table S1.** Alpha diversity of the gut microbial communities in NCD or HFD-fed mice after resveratrol or rapamycin treatment. 16S rRNA V1-2 sequences obtained by 454 pyrosquencing were used to analyze alpha diversity at the OTU level. *F*- and *p*-values are from two-way ANOVA after Bonferroni's post hoc test. \**P* < .05; \*\**P* < .005 compared with NCD-CT, #*P* < .05 compared with HFD-CT.

| Group       | # Observed OTUs | Chao1           | Shannon         | Phylogenetic Diversity | Simpson        |
|-------------|-----------------|-----------------|-----------------|------------------------|----------------|
| NCD-CT      | 301±14          | 405±16          | 5.81±0.23       | 25.13±0.38             | 0.96±0.01      |
| NCD-Res     | 306±24          | 432±30          | 5.90±0.11       | 24.86±0.85             | 0.96±0.01      |
| NCD-Rapa    | 251±25          | 335±20          | 5.00±0.32       | 21.55±1.07*            | 0.92±0.01      |
| HFD-CT      | 229±12*         | 318±29          | 5.07±0.13       | 20.49±0.82**           | 0.92±0.01      |
| HFD-Res     | 171±6**         | 246±20**        | 4.48±0.06**     | 17.18±0.77**, #        | 0.91±0.01*     |
| HFD-Rapa    | 215±19*         | 305±27*         | 5.15±0.37       | 18.89±1.21**           | 0.93±0.02      |
| Interaction | F=3.72, P<.05   | F=5.05, P<.05   | F=6.06, P<.05   | F=4.05, P<.05          | F=5.14, P<.05  |
| Treatment   | F=1.69, P=0.21  | F=1.39, P=0.27  | F=1.36, P=0.28  | F=4.44, P<.05          | F=1.10, P=0.35 |
| Diet        | F=29.07, P<.005 | F=24.60, P<.005 | F=12.30, P<.005 | F=47.12, P<.005        | F=8.36, P<.05  |

**Supplementary Table S2.** *F*- and *p*-values of Figures 4A and 4B are from two-way ANOVA after Bonferroni's post hoc test.

| <b>Source of Variation</b> | <b><i>Lactococcus</i></b>       | <b><i>Clostridium XI</i></b>         | <b><i>Oscillibacter</i></b>     | <b><i>Pseudoflavonifractor</i></b>   | <b><i>Flavonifractor</i></b>    | <b><i>Hydrogeno-anaerobacterium</i></b> | <b><i>Howardella</i></b>           |
|----------------------------|---------------------------------|--------------------------------------|---------------------------------|--------------------------------------|---------------------------------|-----------------------------------------|------------------------------------|
| Interaction                | <i>F</i> =9.50, <i>P</i> <.005  | <i>F</i> =17.61, <i>P</i> <.005      | <i>F</i> =13.11, <i>P</i> <.005 | <i>F</i> =23.30, <i>P</i> <.005      | <i>F</i> =27.30, <i>P</i> <.005 | <i>F</i> =10.98, <i>P</i> <.005         | <i>F</i> =5.97, <i>P</i> <.05      |
| Treatment                  | <i>F</i> =10.01, <i>P</i> <.005 | <i>F</i> =15.84, <i>P</i> <.005      | <i>F</i> =23.19, <i>P</i> <.005 | <i>F</i> =11.71, <i>P</i> <.005      | <i>F</i> =16.35, <i>P</i> <.005 | <i>F</i> =3.88, <i>P</i> =0.07          | <i>F</i> =8.92, <i>P</i> <.05      |
| Diet                       | <i>F</i> =205.9, <i>P</i> <.005 | <i>F</i> =85.69, <i>P</i> <.005      | <i>F</i> =23.54, <i>P</i> <.005 | <i>F</i> =13.51, <i>P</i> <.005      | <i>F</i> =3.76, <i>P</i> =0.07  | <i>F</i> =8.42, <i>P</i> <.05           | <i>F</i> =26.27, <i>P</i> <.005    |
| <b>Source of Variation</b> | <b><i>Turicibacter</i></b>      | <b><i>UC_Marinilabiliaceae</i></b>   | <b><i>Alloprevotella</i></b>    | <b><i>UC_Porphyr-omonadaceae</i></b> | <b><i>Ruminococcus</i></b>      | <b><i>Turicibacter</i></b>              | <b><i>UC_Marinilabiliaceae</i></b> |
| Interaction                | <i>F</i> =17.61, <i>P</i> <.005 | <i>F</i> =2.75, <i>P</i> =0.12       | <i>F</i> =14.49, <i>P</i> <.005 | <i>F</i> =7.37, <i>P</i> <.05        | <i>F</i> =27.30, <i>P</i> <.005 | <i>F</i> =10.53, <i>P</i> <.05          | <i>F</i> =12.39, <i>P</i> <.005    |
| Treatment                  | <i>F</i> =15.84, <i>P</i> <.005 | <i>F</i> =3.0, <i>P</i> =0.10        | <i>F</i> =19.87, <i>P</i> <.005 | <i>F</i> =0.51, <i>P</i> =0.49       | <i>F</i> =16.35, <i>P</i> <.005 | <i>F</i> =10.44, <i>P</i> <.05          | <i>F</i> =14.09, <i>P</i> <.005    |
| Diet                       | <i>F</i> =85.69, <i>P</i> <.005 | <i>F</i> =78.11, <i>P</i> <.005      | <i>F</i> =20.84, <i>P</i> <.005 | <i>F</i> =47.94, <i>P</i> <.005      | <i>F</i> =3.76, <i>P</i> =0.07  | <i>F</i> =10.50, <i>P</i> <.05          | <i>F</i> =9.01, <i>P</i> <.05      |
| <b>Source of Variation</b> | <b><i>Alloprevotella</i></b>    | <b><i>UC_Porphyr-omonadaceae</i></b> | <b><i>Ruminococcus</i></b>      |                                      |                                 |                                         |                                    |
| Interaction                | <i>F</i> =1.95, <i>P</i> =0.18  | <i>F</i> =13.11, <i>P</i> <.005      | <i>F</i> =3.36, <i>P</i> =0.09  |                                      |                                 |                                         |                                    |
| Treatment                  | <i>F</i> =0.49, <i>P</i> =0.50  | <i>F</i> =13.11, <i>P</i> <.005      | <i>F</i> =2.84, <i>P</i> =0.11  |                                      |                                 |                                         |                                    |
| Diet                       | <i>F</i> =21.40, <i>P</i> <.005 | <i>F</i> =13.11, <i>P</i> <.005      | <i>F</i> =7.60, <i>P</i> <.05   |                                      |                                 |                                         |                                    |

**Supplementary Table S3.** Formula of normal chow diet (NCD).

| <b>Purina Lab. Rodent Chow (38057)</b> |              |                |                          |        |       |
|----------------------------------------|--------------|----------------|--------------------------|--------|-------|
| <b>Nutrients</b>                       |              |                | <b>Minerals</b>          |        |       |
| <b>Protein</b>                         | <b>20</b>    | <b>g%</b>      | Ash                      | 7.25   | g%    |
| Arginine                               | 1.26         | g%             | Calcium                  | 1.2    | g%    |
| Cystine                                | 0.37         | g%             | Phosphorus               | 0.62   | g%    |
| Glycine                                | 0.87         | g%             | Phosphorus (non-phytate) | 0.4    | g%    |
| Histidine                              | 0.5          | g%             | Potassium                | 0.82   | g%    |
| Isoleucine                             | 0.82         | g%             | Magnesium                | 0.16   | g%    |
| Leucine                                | 1.47         | g%             | Sulfur                   | 0.22   | g%    |
| Lysine                                 | 1.01         | g%             | Sodium                   | 0.34   | g%    |
| Methionine                             | 0.33         | g%             | Chlorine                 | 0.47   | g%    |
| Phenylalanine                          | 0.98         | g%             | Fluorine                 | 21.38  | ppm   |
| Tyrosine                               | 0.63         | g%             | Iron                     | 112.93 | ppm   |
| Threonine                              | 0.72         | g%             | Zinc                     | 128.85 | ppm   |
| Tryptophan                             | 0.25         | g%             | Manganese                | 95.49  | ppm   |
| Valine                                 | 0.91         | g%             | Copper                   | 22.74  | ppm   |
| <b>Fat (ether extract)</b>             |              |                | Cobalt                   | 0.76   | ppm   |
| Linoleic Acid                          | 1.1          | g%             | Iodine                   | 1.42   | ppm   |
| Linolenic Acid                         | 0.12         | g%             | Chromium                 | 0      | ppm   |
| Arachidonic Acid                       | 0.02         | g%             | Selenium                 | 0.32   | ppm   |
| Omega-3 Fatty Acids                    | 1.11         | g%             | <b>Vitamins</b>          |        |       |
| <b>Fiber (Crude)</b>                   |              |                | Vitamin K                | 6.69   | ppm   |
|                                        | <b>3.7</b>   | <b>g%</b>      | Thiamin Hydrochloride    | 11.02  | ppm   |
| <b>Calories provided by :</b>          |              |                | Riboflavin               | 11.57  | ppm   |
| Protein                                | <b>24.52</b> | <b>%</b>       | Niacin                   | 217.7  | ppm   |
| Fat (ether extract)                    | <b>12.41</b> | <b>%</b>       | Pantothenic Acid         | 88.72  | ppm   |
| Carbohydrates                          | <b>63.07</b> | <b>%</b>       | Choline Chloride         | 3447.9 | ppm   |
| <b>Total</b>                           | <b>3,940</b> | <b>kcal/kg</b> |                          | 6      | ppm   |
|                                        |              |                | Folic Acid               | 13.6   | ppm   |
|                                        |              |                | Pyridoxine               | 11     | ppm   |
|                                        |              |                | Biotin                   | 0.15   | ppm   |
|                                        |              |                | B12                      | 41     | ppm   |
|                                        |              |                | Vitamin A                | 28.03  | IU/kg |
|                                        |              |                | Vitamin D3 (added)       | 4      | IU/kg |
|                                        |              |                | Vitamin E                | 100    | IU/kg |



**Supplementary Table S4.** Formula of high-fat diet (HFD).

| <b>Research Diet #D12492</b>          | <b>g%</b>     | <b>kcal%</b> |
|---------------------------------------|---------------|--------------|
| <b>Protein</b>                        | 26.2          | 20           |
| <b>Carbohydrate</b>                   | 26.3          | 20           |
| <b>Fat</b>                            | 34.9          | 60           |
| <b>Total</b>                          |               | 100          |
| <b>kcal/g</b>                         | 5.24          |              |
| <b>Ingredient</b>                     | <b>g</b>      | <b>kcal</b>  |
| Casein, 30 Mesh                       | 200           | 800          |
| L-Cystine                             | 3             | 12           |
| Corn Starch                           | 0             | 0            |
| Maltodextrin 10                       | 125           | 500          |
| Sucrose                               | 68.8          | 275.2        |
| Cellulose, BW200                      | 50            | 0            |
| Soybean Oil                           | 25            | 225          |
| Lard*                                 | 245           | 2205         |
| Mineral Mix S10026**                  | 10            | 0            |
| DiCalcium Phosphate                   | 13            | 0            |
| Calcium Carbonate                     | 5.5           | 0            |
| Potassium Citrate, 1 H <sub>2</sub> O | 16.5          | 0            |
| Vitamin Mix V10001***                 | 10            | 40           |
| Choline Bitartrate                    | 2             | 0            |
| FD&C Blue Dye #1                      | 0.05          | 0            |
| <b>Total</b>                          | <b>773.85</b> | <b>4057</b>  |

\*Typical analysis of cholesterol in lard = 0.72 mg/g.

Cholesterol (mg)/4057 kcal = 216.4

Cholesterol (mg)/kg = 279.6

| <b>**Mineral Mix S10026</b>                        | <b>g</b> |
|----------------------------------------------------|----------|
| Sodium Chloride (39.3% Na 60.7% Cl)                | 2.59     |
| Magnesium Oxide, Heavy, DC USP (60.3% Mg)          | 0.419    |
| Magnesium Sulfate, Heptahydrate (9.87% Mg 13.0% S) | 2.576    |
| Ammonium Molybdate Tetrahydrate                    | 0.003    |
| Chromium Potassium Sulfate (10.4% Cr)              | 0.01925  |
| Copper Carbonate (57.5% Cu)                        | 0.0105   |
| Ferric Citrate (17.4% Fe)                          | 0.21     |
| Manganese Carbonate Hydrate (47.8 Mn)              | 0.1225   |
| Potassium Iodate (59.3% I)                         | 0.00035  |
| Sodium Fluoride (45.2%% F)                         | 0.002    |
| Sodium Selenite (45.7% Se)                         | 0.00035  |
| Zinc Carbonate (52.1% Zn)                          | 0.056    |
| Sucrose                                            | 3.99105  |

| <b>***Vitamin Mix V10001</b>                 | <b>g</b> |
|----------------------------------------------|----------|
| Vitamin A Palmitate (500,000 IU/gm)          | 0.008    |
| Vitamin D3 (100,000 IU/gm)                   | 0.01     |
| Vitamin E Acetate (500 IU/gm)                | 0.1      |
| Menadione Sodium Bisulfite (62.5% Menadione) | 0.0008   |
| Biotin, 1.0%                                 | 0.02     |
| Cyanocobalamin, 0.1%                         | 0.01     |
| Folic Acid                                   | 0.002    |
| Nicotinic Acid                               | 0.03     |
| Calcium Pantothenate                         | 0.016    |
| Pyridoxine-HCl                               | 0.007    |
| Riboflavin                                   | 0.006    |
| Thiamin HCl                                  | 0.006    |
| Sucrose                                      | 9.78     |
